# Supplementary material for: The cloacal microbiome of a cavity-nesting raptor, the lesser kestrel (Falco naumanni)
Source: PeerJ. 2022 Oct 6;10:e13927. doi: 10.7717/peerj.13927 (PMC9548316; doi:10.7717/peerj.13927)
Supplement: Supplemental Information 4 [file peerj-10-13927-s004.zip]

Archive with 5 entries (5 files):
- code and pipeline/asv_rdp_merge.py
- code and pipeline/asv_sort.py
- code and pipeline/codes_pipeline.docx
- code and pipeline/dada2_180719_big.data_wd.R
- code and pipeline/rdp_dada2.sh
