# Supplementary material for: The cloacal microbiome of a cavity-nesting raptor, the lesser kestrel (Falco naumanni)
Source: PeerJ. 2022 Oct 6;10:e13927. doi: 10.7717/peerj.13927 (PMC9548316; doi:10.7717/peerj.13927)
Supplement: Supplemental Information 4 [file peerj-10-13927-s004.zip › code and pipeline/asv_sort.py]

#!/usr/bin/python

"""
Usage: 
....

"""
    
import io
import sys
import string


if len(sys.argv) == 1:
	print __doc__
	exit(0)

      
asv = open(sys.argv[1], "r")
lines=asv.readlines()
fasta=open(sys.argv[1]+".fasta", "w")

for l in lines[1:]:
	fasta.write(">"+l.split('\t')[1])
	fasta.write(l.split('\t')[0])
	fasta.write("\n")

asv.close()
fasta.close()
