# Supplementary material for: The cloacal microbiome of a cavity-nesting raptor, the lesser kestrel (Falco naumanni)
Source: PeerJ. 2022 Oct 6;10:e13927. doi: 10.7717/peerj.13927 (PMC9548316; doi:10.7717/peerj.13927)
Supplement: Supplemental Information 4 [file peerj-10-13927-s004.zip › code and pipeline/rdp_dada2.sh]

#!/bin/bash


read -p "Inserisci il nome del file " fl

cut -f1,2 $fl > $fl.asv_id_seq

python3 /usr/local/scripts/asv_sort.py $fl.asv_id_seq

java -Xmx1g -jar /usr/local/bioinf/rdp_classifier_2.11/dist/classifier.jar classify -c 0.8 -o $fl.otu.rdp.txt -h $fl.otu.rdp.hier.txt -f fixrank  $fl.asv_id_seq.fasta

python3 /usr/local/scripts/asv_rdp_merge.py $fl $fl.otu.rdp.txt
